# Supplementary material for: Eight membered cyclic-borasiloxanes: synthesis, structural, photophysical, steric strain and DFT calculations
Source: Royal Society of Chemistry journal article supplement (doi:10.1039/c6ra02080a), 2016-01-01
Supplement: c6ra02080a1.pdf [file c6ra02080a1.pdf]

## Supplementary Information

### **Eight Membered Cyclic-Borasiloxanes: Synthesis, Structural, Photophysical, Steric Strain and DFT calculations**

Mohan Gopalakrishnan<sup>a</sup>, Krishnan Thirumoorthy<sup>a</sup>, Nattamai S. P. Bhuvanesh<sup>b</sup>, Palanisami Nallasamy <sup>\*a</sup>

<sup>a</sup> Department of Chemistry, School of Advanced Sciences, VIT University, Vellore 632 014, Tamil Nadu, India.

<sup>b</sup>X-ray Diffraction Lab, Department of Chemistry, Texas A&M University, College Station, TX 77842, USA

Corresponding author: E-mail: palanisami.n@gmail.com; Tel: +91 98426 39776

**Table S1**The optimized structures of borasiloxanes **1-5** at B3LYP/6-31+G\*\* level of theory.

| Compound | Structures                                                                          | Optimized structures                                                                 | Energy (Hartree) |
|----------|-------------------------------------------------------------------------------------|--------------------------------------------------------------------------------------|------------------|
| 1        | 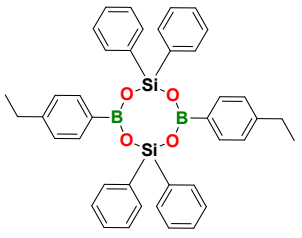   |    | -2477.352        |
| 2        |    |    | -2634.615        |
| 3        |   |   | -2782.198        |
| 4        |  |  | -2782.219        |
| 5        |  |  | -2782.219        |

Table S2. Cartesian coordinates of compound **1-5**, optimized at B3LYP/6-31+G\*\* level of theory

| Compound 1 |             |          |          | Compound 2 |             |          |          |
|------------|-------------|----------|----------|------------|-------------|----------|----------|
| Atoms      | Coordinates |          |          | Atoms      | Coordinates |          |          |
|            | X           | Y        | Z        |            | X           | Y        | Z        |
| Si         | 0.228209    | -2.07302 | -0.02985 | Si         | 0.025701    | 2.085285 | 0.05216  |
| O          | -1.15569    | 0.854704 | 0.818066 | O          | -1.37246    | 1.223922 | -0.15003 |
| O          | 1.497705    | 0.699949 | 0.073786 | O          | 1.384297    | 1.154287 | -0.10304 |
| C          | 0.103644    | -1.67419 | 0.829748 | C          | 0.04501     | 3.372809 | -1.30559 |
| C          | -0.4793     | -0.08816 | -1.80823 | C          | 0.048215    | 2.81275  | 1.77742  |
| B          | 2.295829    | 1.803301 | 0.190151 | B          | 2.043026    | -0.03863 | -0.0024  |
| B          | -1.64775    | 2.058851 | 1.24698  | B          | -2.04292    | 0.038489 | 0.001084 |
| C          | -0.18199    | -1.82755 | 2.199313 | C          | -0.63397    | 3.159459 | -2.51957 |
| C          | 0.493802    | -2.81573 | 0.105423 | C          | 0.755119    | 4.57774  | -1.14952 |
| C          | -1.83055    | -0.20686 | -2.18651 | C          | -1.13968    | 3.278515 | 2.372919 |
| C          | 0.4913      | -0.06041 | -2.82745 | C          | 1.245297    | 2.935298 | 2.508068 |
| Si         | 0.648093    | 3.862128 | 1.43717  | Si         | -0.02562    | -2.08546 | -0.05335 |
| O          | 1.803775    | 3.007449 | 0.619072 | O          | 1.372567    | -1.22408 | 0.148686 |
| C          | 3.811636    | 1.694751 | -0.18824 | C          | 3.609149    | -0.05139 | -0.04293 |
| O          | -0.84962    | 3.162207 | 1.363343 | O          | -1.38419    | -1.15441 | 0.101883 |
| C          | -3.16355    | 2.167395 | 1.625378 | C          | -3.60903    | 0.05133  | 0.042279 |
| H          | -0.4993     | -0.96785 | 2.783544 | H          | -1.20321    | 2.245244 | -2.66436 |
| C          | -0.07297    | -3.07204 | 2.824418 | C          | -0.59759    | 4.10922  | -3.54354 |
| C          | 0.604043    | -4.06314 | 0.725445 | C          | 0.794411    | 5.531305 | -2.16994 |
| H          | 0.704852    | -2.73609 | -0.9584  | H          | 1.275908    | 4.782896 | -0.21713 |
| H          | -2.60582    | -0.22054 | -1.42477 | H          | -2.08258    | 3.188992 | 1.839587 |
| C          | -2.19905    | -0.29668 | -3.53073 | C          | -1.13339    | 3.847211 | 3.648533 |
| C          | 0.127472    | -0.15283 | -4.17402 | C          | 1.25699     | 3.506339 | 3.783921 |
| H          | 1.542071    | 0.042495 | -2.56956 | H          | 2.177408    | 2.574149 | 2.081514 |
| C          | 0.54448     | 5.536358 | 0.607497 | C          | -0.04494    | -3.37294 | 1.304435 |
| C          | 1.127379    | 3.9502   | 3.245405 | C          | -0.04841    | -2.81307 | -1.77854 |
| C          | 4.645048    | 2.831008 | -0.21623 | C          | 4.341277    | -1.22731 | 0.186717 |
| C          | 4.400551    | 0.460709 | -0.51018 | C          | 4.349209    | 1.116253 | -0.31034 |
| C          | -3.99695    | 1.031133 | 1.653377 | C          | -4.34106    | 1.22819  | -0.18284 |
| C          | -3.75247    | 3.401437 | 1.94732  | C          | -4.34911    | -1.11708 | 0.306248 |
| H          | -0.29814    | -3.16754 | 3.883096 | H          | -1.12922    | 3.923828 | -4.47292 |
| C          | 0.321856    | -4.1926  | 2.087919 | C          | 0.118278    | 5.297181 | -3.37045 |
| H          | 0.904952    | -4.93153 | 0.145867 | H          | 1.346932    | 6.455804 | -2.02662 |
| H          | -3.24821    | -0.38188 | -3.79988 | H          | -2.06286    | 4.194684 | 4.091065 |
| C          | -1.21907    | -0.27175 | -4.52752 | C          | 0.06701     | 3.963905 | 4.355787 |
| H          | 0.893394    | -0.12698 | -4.94428 | H          | 2.192027    | 3.588868 | 4.331224 |
| C          | 0.830297    | 5.689806 | -0.76202 | C          | 0.63422     | -3.15968 | 2.518344 |
| C          | 0.15416     | 6.677835 | 1.331831 | C          | -0.75519    | -4.57779 | 1.14835  |
| C          | 2.478627    | 4.068905 | 3.623705 | C          | 1.13934     | -3.27898 | -2.3742  |
| C          | 0.156773    | 3.922364 | 4.264622 | C          | -1.24565    | -2.93557 | -2.50896 |
| H          | 4.223255    | 3.802926 | 0.025503 | H          | 3.808382    | -2.15064 | 0.398064 |
| C          | 5.992507    | 2.732963 | -0.55165 | C          | 5.738434    | -1.24112 | 0.156859 |
| C          | 5.755074    | 0.358267 | -0.84013 | C          | 5.741105    | 1.103341 | -0.34689 |

|   |          |          |          |   |          |          |          |
|---|----------|----------|----------|---|----------|----------|----------|
| H | 3.7894   | -0.43766 | -0.49181 | H | 3.820682 | 2.046222 | -0.50185 |
| H | -3.57516 | 0.059218 | 1.41165  | H | -3.80813 | 2.152186 | -0.39109 |
| C | -5.34441 | 1.129173 | 1.988815 | C | -5.73819 | 1.242207 | -0.15176 |
| C | -5.10699 | 3.503872 | 2.277273 | C | -5.741   | -1.10405 | 0.343735 |
| H | -3.14132 | 4.299805 | 1.928945 | H | -3.82064 | -2.04783 | 0.494131 |
| H | 0.404627 | -5.1617  | 2.572209 | H | 0.145178 | 6.038161 | -4.16468 |
| H | -1.5041  | -0.34076 | -5.57371 | H | 0.07373  | 4.405344 | 5.348608 |
| H | 1.147734 | 4.830159 | -1.34625 | H | 1.203613 | -2.24555 | 2.663079 |
| C | 0.721303 | 6.934327 | -1.38707 | C | 0.597837 | -4.1095  | 3.542255 |
| C | 0.043942 | 7.925274 | 0.711863 | C | -0.79447 | -5.53139 | 2.168733 |
| H | -0.05704 | 6.598125 | 2.395623 | H | -1.27609 | -4.78284 | 0.215978 |
| H | 3.253899 | 4.082649 | 2.861975 | H | 2.082349 | -3.18948 | -1.84105 |
| C | 2.84711  | 4.158657 | 4.967928 | C | 1.132764 | -3.84775 | -3.64978 |
| C | 0.520591 | 4.014713 | 5.611196 | C | -1.25761 | -3.50673 | -3.78476 |
| H | -0.894   | 3.819458 | 4.006717 | H | -2.17766 | -2.57433 | -2.08225 |
| H | 6.608832 | 3.629883 | -0.5677  | H | 6.249696 | -2.17823 | 0.346332 |
| C | 6.576345 | 1.493371 | -0.86878 | C | 6.473646 | -0.076   | -0.11146 |
| H | 6.167898 | -0.61781 | -1.07403 | H | 6.264989 | 2.029841 | -0.56384 |
| H | -5.96073 | 0.23225  | 2.004866 | H | -6.2494  | 2.180115 | -0.3374  |
| C | -5.92826 | 2.368764 | 2.305942 | C | -6.47347 | 0.076289 | 0.112981 |
| H | -5.51982 | 4.479947 | 2.511177 | H | -6.26489 | -2.03119 | 0.557951 |
| H | 0.946624 | 7.029898 | -2.44571 | H | 1.129597 | -3.92423 | 4.471573 |
| C | 0.326316 | 8.054823 | -0.65056 | C | -0.11819 | -5.29737 | 3.369175 |
| H | -0.25709 | 8.793613 | 1.291448 | H | -1.3471  | -6.45584 | 2.02542  |
| H | 3.896273 | 4.243862 | 5.237092 | H | 2.062126 | -4.19532 | -4.09246 |
| C | 1.867132 | 4.133641 | 5.964715 | C | -0.06777 | -3.96442 | -4.3568  |
| H | -0.24533 | 3.988807 | 6.381454 | H | -2.19275 | -3.58925 | -4.33188 |
| C | 8.053485 | 1.442958 | -1.22474 | H | -0.14507 | -6.03839 | 4.163367 |
| C | -7.4054  | 2.419171 | 2.661899 | H | -0.0747  | -4.40594 | -5.34957 |
| H | 0.243562 | 9.023948 | -1.13481 | C | 8.011968 | -0.04803 | -0.15702 |
| H | 2.152153 | 4.202598 | 7.010914 | C | 8.477983 | 0.402532 | -1.56371 |
| H | 8.21786  | 2.089394 | -2.09806 | C | 8.541554 | 0.952575 | 0.900176 |
| H | 8.618135 | 1.91141  | -0.40702 | C | 8.635196 | -1.42719 | 0.135813 |
| C | 8.645447 | 0.059809 | -1.51068 | H | 8.123894 | -0.29095 | -2.33404 |
| H | -7.56978 | 1.772689 | 3.535189 | H | 8.105929 | 1.400303 | -1.81512 |
| H | -7.97005 | 1.950769 | 1.844157 | H | 9.572893 | 0.432051 | -1.60818 |
| C | -7.99734 | 3.80231  | 2.947917 | H | 8.229128 | 0.658491 | 1.908061 |
| H | 9.711681 | 0.147488 | -1.7427  | H | 9.637171 | 0.982489 | 0.877537 |
| H | 8.159967 | -0.4212  | -2.36677 | H | 8.176134 | 1.96792  | 0.719073 |
| H | 8.547618 | -0.60879 | -0.64844 | H | 9.727045 | -1.35279 | 0.092088 |
| H | -9.06358 | 3.714626 | 3.17994  | H | 8.369111 | -1.79231 | 1.133666 |

| Compound 3 |             |          |          | Compound 4 |             |          |          |
|------------|-------------|----------|----------|------------|-------------|----------|----------|
| Atoms      | Coordinates |          |          | Atoms      | Coordinates |          |          |
|            | X           | Y        | Z        |            | X           | Y        | Z        |
| Si         | -1.03093    | -1.61327 | 0.770454 | Si         | 0.028665    | 2.098062 | -0.18331 |
| O          | -1.84994    | -0.17393 | 0.607216 | O          | -1.34444    | 1.196783 | -0.00039 |

|    |          |          |          |    |          |          |          |
|----|----------|----------|----------|----|----------|----------|----------|
| O  | 0.369917 | -1.61956 | -0.10695 | O  | 1.408421 | 1.193084 | -0.05592 |
| C  | -2.13001 | -2.96672 | 0.108258 | C  | 0.01791  | 3.36646  | 1.192264 |
| C  | -0.57761 | -1.84006 | 2.576208 | C  | 0.036486 | 2.863362 | -1.89227 |
| B  | 1.57059  | -1.16619 | -0.57238 | B  | 2.038624 | -0.01959 | -0.02219 |
| B  | -1.57279 | 1.165765 | 0.559618 | B  | -2.03868 | 0.019526 | 0.021952 |
| C  | -1.59994 | -4.2474  | -0.14436 | C  | 0.88086  | 4.477706 | 1.141102 |
| C  | -3.50021 | -2.75534 | -0.12927 | C  | -0.82878 | 3.239471 | 2.308319 |
| C  | -1.23914 | -2.7836  | 3.382414 | C  | -1.02402 | 3.695393 | -2.30074 |
| C  | 0.420319 | -1.04612 | 3.17527  | C  | 1.083101 | 2.633845 | -2.80365 |
| Si | 1.031499 | 1.614115 | -0.77746 | Si | -0.02872 | -2.09814 | 0.183122 |
| O  | 1.848883 | 0.173422 | -0.61731 | O  | 1.344345 | -1.19683 | 1.06E-05 |
| C  | 2.582745 | -2.22698 | -1.1604  | C  | 3.606147 | -0.05972 | -0.0275  |
| O  | -0.37073 | 1.618803 | 0.097734 | O  | -1.40846 | -1.19314 | 0.055763 |
| C  | -2.58244 | 2.224595 | 1.155492 | C  | -3.6062  | 0.059673 | 0.027395 |
| H  | -0.54283 | -4.43906 | 0.023544 | H  | 1.538196 | 4.614231 | 0.285333 |
| C  | -2.41046 | -5.28247 | -0.61581 | C  | 0.904446 | 5.422544 | 2.169141 |
| H  | -3.9338  | -1.77621 | 0.048495 | H  | -1.51321 | 2.398091 | 2.371946 |
| C  | -4.31374 | -3.7895  | -0.60227 | C  | -0.8097  | 4.182206 | 3.339873 |
| H  | -2.01276 | -3.4137  | 2.951816 | H  | -1.84757 | 3.897482 | -1.61985 |
| C  | -0.91802 | -2.93131 | 4.735512 | C  | -1.04243 | 4.271684 | -3.57209 |
| H  | 0.957105 | -0.30634 | 2.585248 | H  | 1.917766 | 2.000716 | -2.51623 |
| C  | 0.742032 | -1.18694 | 4.526864 | C  | 1.070089 | 3.209039 | -4.07792 |
| C  | 2.129311 | 2.965245 | -0.10881 | C  | -0.01801 | -3.36663 | -1.19237 |
| C  | 0.582209 | 1.847125 | -2.58358 | C  | -0.0364  | -2.86335 | 1.892111 |
| C  | 2.019159 | -3.20637 | -2.00263 | C  | 4.369344 | 1.122293 | 0.004387 |
| C  | 3.991676 | -2.21288 | -1.00605 | C  | 4.309296 | -1.27841 | -0.06349 |
| C  | -2.01573 | 3.202436 | 1.997222 | C  | -4.36943 | -1.12232 | -0.00474 |
| C  | -3.99233 | 2.207886 | 1.009854 | C  | -4.30932 | 1.278362 | 0.063764 |
| H  | -1.98235 | -6.26279 | -0.8055  | H  | 1.577767 | 6.273073 | 2.108604 |
| C  | -3.77117 | -5.05372 | -0.84514 | C  | 0.058302 | 5.274889 | 3.272257 |
| H  | -5.36822 | -3.60323 | -0.78381 | H  | -1.47218 | 4.064401 | 4.193004 |
| H  | -1.44129 | -3.66876 | 5.337457 | H  | -1.87205 | 4.908141 | -3.86712 |
| C  | 0.072572 | -2.13257 | 5.310194 | C  | 0.006791 | 4.028292 | -4.4641  |
| H  | 1.512212 | -0.56033 | 4.968057 | H  | 1.888689 | 3.01727  | -4.76615 |
| C  | 1.598934 | 4.244804 | 0.148546 | C  | -0.88065 | -4.4781  | -1.14092 |
| C  | 3.499284 | 2.752743 | 0.129531 | C  | 0.82832  | -3.23945 | -2.30868 |
| C  | 1.243429 | 2.795617 | -3.38423 | C  | 1.023942 | -3.69572 | 2.30032  |
| C  | -0.41141 | 1.052482 | -3.18891 | C  | -1.08264 | -2.63338 | 2.803809 |
| H  | 0.939219 | -3.23919 | -2.1173  | H  | 3.858338 | 2.080511 | 0.02946  |
| C  | 2.803954 | -4.11637 | -2.7125  | C  | 5.762364 | 1.09129  | 0.001992 |
| C  | 4.685236 | -1.30073 | -0.05402 | C  | 5.702116 | -1.31735 | -0.06787 |
| C  | 4.772951 | -3.14038 | -1.71712 | H  | -3.85845 | -2.08054 | -0.03009 |
| H  | -0.93511 | 3.237263 | 2.105242 | C  | -5.76245 | -1.09128 | -0.00224 |
| C  | -2.79807 | 4.107375 | 2.715948 | C  | -5.70214 | 1.317333 | 0.068275 |
| C  | -4.68957 | 1.297204 | 0.059079 | H  | -0.00508 | 4.476122 | -5.45393 |
| C  | -4.77132 | 3.130661 | 1.729825 | H  | -1.53771 | -4.61477 | -0.28496 |

|   |          |          |          |   |          |          |          |
|---|----------|----------|----------|---|----------|----------|----------|
| H | 0.323071 | -2.24476 | 6.361128 | C | -0.90429 | -5.42298 | -2.16892 |
| H | 0.541828 | 4.436897 | -0.01894 | H | 1.512499 | -2.39789 | -2.37254 |
| C | 2.408995 | 5.277808 | 0.625122 | C | 0.809178 | -4.18223 | -3.3402  |
| H | 3.933192 | 1.774529 | -0.05205 | H | 1.84719  | -3.89817 | 1.619175 |
| C | 4.312308 | 3.784848 | 0.607828 | C | 1.042565 | -4.27189 | 3.571722 |
| H | 2.014073 | 3.426133 | -2.94891 | H | -1.9172  | -2.00001 | 2.516591 |
| C | 0.925702 | 2.947927 | -4.73762 | C | -1.06942 | -3.20845 | 4.078125 |
| H | -0.94703 | 0.308052 | -2.6037  | H | 6.319986 | 2.023387 | 0.004457 |
| C | -0.7296  | 1.197769 | -4.54086 | C | 6.457307 | -0.13109 | -0.03467 |
| H | 2.33611  | -4.84766 | -3.36543 | H | 6.212503 | -2.27618 | -0.06954 |
| C | 4.19207  | -4.07735 | -2.57159 | H | -6.32009 | -2.02337 | -0.0049  |
| C | 4.26165  | -1.1937  | 1.281679 | C | -6.45736 | 0.131106 | 0.034804 |
| C | 5.826873 | -0.5808  | -0.44778 | H | -6.2125  | 2.276175 | 0.070255 |
| H | 5.849282 | -3.14392 | -1.57113 | H | -1.57737 | -6.27369 | -2.10816 |
| H | -2.3277  | 4.836971 | 3.368883 | C | -0.05851 | -5.27514 | -3.27229 |
| C | -4.18704 | 4.065634 | 2.584112 | H | 1.471379 | -4.06427 | -4.19353 |
| C | -4.28    | 1.202871 | -1.28206 | H | 1.872056 | -4.90861 | 3.866544 |
| C | -5.82306 | 0.567969 | 0.459367 | C | -0.00628 | -4.02803 | 4.46405  |
| H | -5.84855 | 3.132786 | 1.590339 | H | -1.88773 | -3.01633 | 4.766599 |
| H | 1.980573 | 6.257185 | 0.818772 | H | -0.0737  | -6.00986 | -4.07257 |
| C | 3.76945  | 5.048104 | 0.855165 | H | 0.005757 | -4.47577 | 5.453924 |
| H | 5.366588 | 3.597708 | 0.789731 | H | 0.073463 | 6.00958  | 4.072565 |
| H | 1.448511 | 3.689369 | -5.33507 | H | 3.751382 | -2.21039 | -0.07885 |
| C | -0.06089 | 2.14869  | -5.31838 | H | -3.75139 | 2.210331 | 0.079346 |
| H | -1.49628 | 0.570316 | -4.98694 | C | 7.942555 | -0.16872 | -0.03601 |
| H | 4.820284 | -4.78311 | -3.10764 | C | 8.641682 | -1.1022  | -0.82205 |
| H | 3.399988 | -1.7644  | 1.616669 | C | 8.689428 | 0.727179 | 0.74979  |
| C | 4.955832 | -0.39609 | 2.193632 | C | 10.03689 | -1.13859 | -0.82322 |
| H | 6.161276 | -0.63757 | -1.47964 | H | 8.08776  | -1.78839 | -1.45587 |
| C | 6.52269  | 0.217704 | 0.462615 | C | 10.08464 | 0.691053 | 0.750293 |
| H | -4.81333 | 4.768189 | 3.126622 | H | 8.172064 | 1.440397 | 1.384601 |
| H | -3.42791 | 1.784047 | -1.62319 | C | 10.76561 | -0.24208 | -0.03658 |
| C | -4.97856 | 0.407147 | -2.19227 | H | 10.55515 | -1.86284 | -1.44552 |
| H | -6.1478  | 0.61636  | 1.494704 | H | 10.63999 | 1.386994 | 1.372879 |
| C | -6.52305 | -0.22875 | -0.44933 | H | 11.85139 | -0.27041 | -0.03657 |
| H | 4.401262 | 5.849921 | 1.227041 | C | -7.9426  | 0.168793 | 0.036256 |
| H | -0.30876 | 2.264442 | -6.36956 | C | -8.64164 | 1.101954 | 0.822753 |
| H | 4.616024 | -0.33718 | 3.223655 | C | -8.68957 | -0.72673 | -0.74988 |
| C | 6.091647 | 0.311246 | 1.789329 | C | -10.0368 | 1.138419 | 0.824009 |
| H | 7.399994 | 0.767893 | 0.133927 | H | -8.08765 | 1.78784  | 1.456853 |
| H | -4.65011 | 0.358727 | -3.22654 | C | -10.0848 | -0.69053 | -0.7503  |
| C | -6.10509 | -0.31084 | -1.7809  | H | -8.17228 | -1.4397  | -1.38503 |
| H | -7.3937  | -0.78637 | -0.11563 | C | -10.7657 | 0.242298 | 0.037017 |
| H | 6.634823 | 0.926891 | 2.500419 | H | -10.555  | 1.862423 | 1.44666  |
| H | -6.65184 | -0.92484 | -2.49065 | H | -10.6402 | -1.38617 | -1.37316 |
| H | -4.40338 | -5.85713 | -1.2129  | H | -11.8514 | 0.270688 | 0.037082 |

Compound 5

| Atoms | Coordinates |          |          | Atoms | Coordinates |          |          |
|-------|-------------|----------|----------|-------|-------------|----------|----------|
|       | X           | Y        | Z        |       | X           | Y        | Z        |
| Si    | -0.32468    | 2.074737 | -0.15112 | H     | -4.0892     | 1.497037 | 0.022085 |
| O     | -1.55781    | 0.972091 | -0.09062 | C     | -5.86755    | 0.269853 | 0.020835 |
| O     | 1.161028    | 1.386438 | 0.080509 | C     | -5.43872    | -2.14739 | -0.04786 |
| C     | -0.39184    | 2.860122 | -1.8496  | H     | -3.38899    | -2.74017 | -0.09672 |
| C     | -0.55678    | 3.30312  | 1.24098  | H     | -0.48917    | 4.51972  | -5.38945 |
| B     | 2.012256    | 0.316129 | 0.065542 | H     | -1.13768    | 5.844096 | 4.155756 |
| B     | -2.01309    | -0.31519 | -0.05968 | H     | 2.034365    | -1.6616  | 2.581829 |
| C     | -1.32529    | 2.447798 | -2.81838 | C     | 1.364346    | -3.04378 | 4.083867 |
| C     | 0.502489    | 3.892345 | -2.1931  | C     | -0.47049    | -4.48892 | 3.456515 |
| C     | -1.60829    | 4.238313 | 1.190424 | H     | -1.23352    | -4.24191 | 1.46766  |
| C     | 0.283626    | 3.316885 | 2.368455 | H     | 2.269687    | -4.26137 | -0.32923 |
| Si    | 0.323967    | -2.07404 | 0.152786 | C     | 1.821679    | -5.13941 | -2.23444 |
| O     | 1.556819    | -0.97105 | 0.094236 | C     | -0.07735    | -4.21746 | -3.41394 |
| C     | 3.559855    | 0.577959 | 0.044688 | H     | -1.11161    | -2.61139 | -2.42979 |
| O     | -1.16179    | -1.38539 | -0.07695 | C     | 6.369831    | 1.071136 | 0.000465 |
| C     | -3.56062    | -0.57759 | -0.04183 | C     | 6.790303    | -1.35281 | -0.05999 |
| H     | -2.03255    | 1.658086 | -2.58182 | H     | 5.817063    | 3.165987 | 0.05415  |
| C     | -1.36144    | 3.03881  | -4.08469 | C     | -6.37026    | -1.07278 | -0.00405 |
| C     | 0.472053    | 4.485529 | -3.45696 | C     | -6.79251    | 1.350601 | 0.066891 |
| H     | 1.232913    | 4.241182 | -1.46692 | H     | -5.81606    | -3.167   | -0.06625 |
| H     | -2.26849    | 4.265344 | 0.326636 | H     | 2.094717    | -2.71066 | 4.815962 |
| C     | -1.81999    | 5.145825 | 2.230609 | C     | 0.464748    | -4.06337 | 4.405144 |
| C     | 0.077513    | 4.223407 | 3.412198 | H     | -1.17192    | -5.28207 | 3.699908 |
| H     | 1.110016    | 2.6144   | 2.430951 | H     | 2.640459    | -5.85103 | -2.17568 |
| C     | 0.392187    | -2.86193 | 1.85009  | C     | 0.977643    | -5.1314  | -3.34899 |
| C     | 0.556493    | -3.29983 | -1.2415  | H     | -0.73905    | -4.20913 | -4.27565 |
| C     | 4.461152    | -0.47668 | 0.006196 | C     | 7.776399    | 1.276791 | -0.02377 |
| C     | 4.083875    | 1.906457 | 0.061578 | H     | 6.40474     | -2.3691  | -0.07485 |
| C     | -4.46262    | 0.476337 | -0.00029 | C     | 8.148794    | -1.1212  | -0.08301 |
| C     | -4.08371    | -1.9063  | -0.06535 | C     | -7.77672    | -1.2795  | 0.017091 |
| H     | -2.09078    | 2.704482 | -4.81724 | H     | -6.40767    | 2.367088 | 0.0871   |
| C     | -0.46193    | 4.058431 | -4.40615 | C     | -8.1509     | 1.117928 | 0.087064 |
| H     | 1.173464    | 5.278663 | -3.70049 | H     | 0.492927    | -4.52585 | 5.38785  |
| H     | -2.63786    | 5.858359 | 2.170467 | H     | 1.139605    | -5.83547 | -4.16047 |
| C     | -0.97632    | 5.138567 | 3.345436 | C     | 8.645916    | 0.207317 | -0.06468 |
| H     | 0.73892     | 4.215613 | 4.274153 | H     | 8.158079    | 2.294549 | -0.00994 |
| C     | 1.32698     | -2.45124 | 2.818281 | H     | 8.844295    | -1.95478 | -0.11594 |
| C     | -0.50218    | -3.89419 | 2.193428 | C     | -8.64705    | -0.21085 | 0.061762 |
| C     | 1.609158    | -4.23381 | -1.19276 | H     | -8.15765    | -2.29744 | -0.00213 |
| C     | -0.28431    | -3.3129  | -2.36867 | H     | -8.84703    | 1.950865 | 0.123105 |
| H     | 4.087043    | -1.49722 | -0.01134 | H     | 9.718352    | 0.37897  | -0.08308 |
| C     | 5.866172    | -0.27123 | -0.01778 | H     | -9.7194     | -0.38332 | 0.077799 |

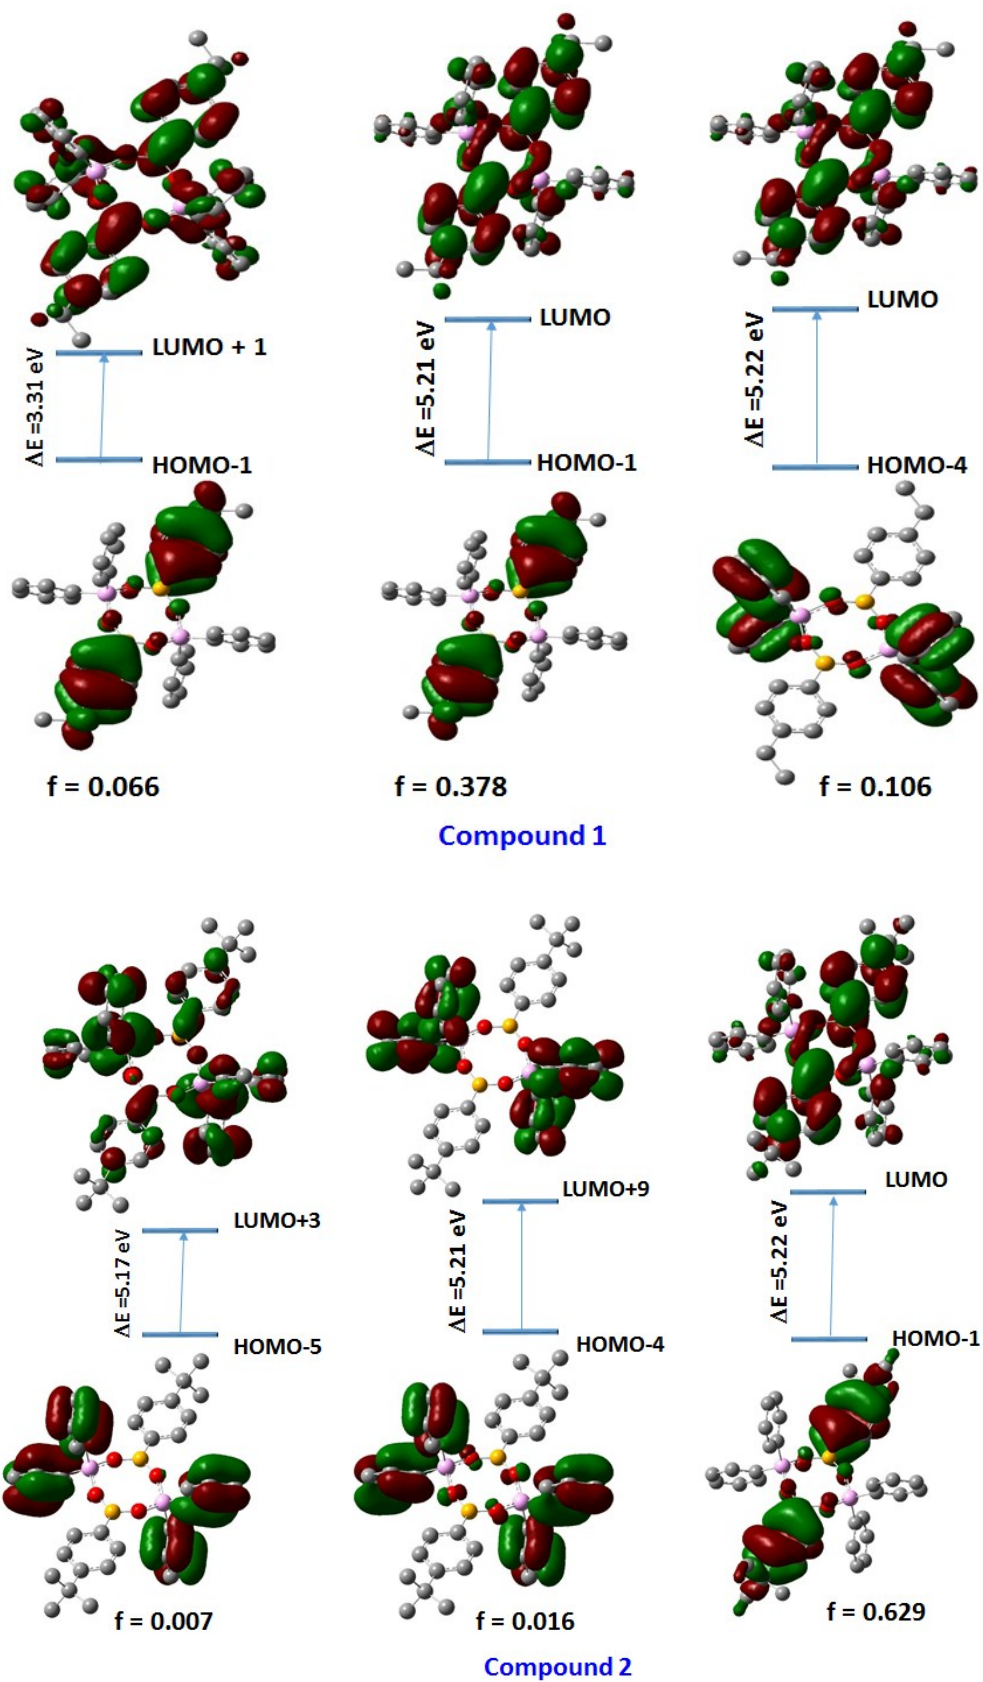

Fig. S1. Frontier molecular orbital energy density plots of **1** and **2**, calculated using TD-DFT with B3LYP/6-31+G\*\* level of theory.



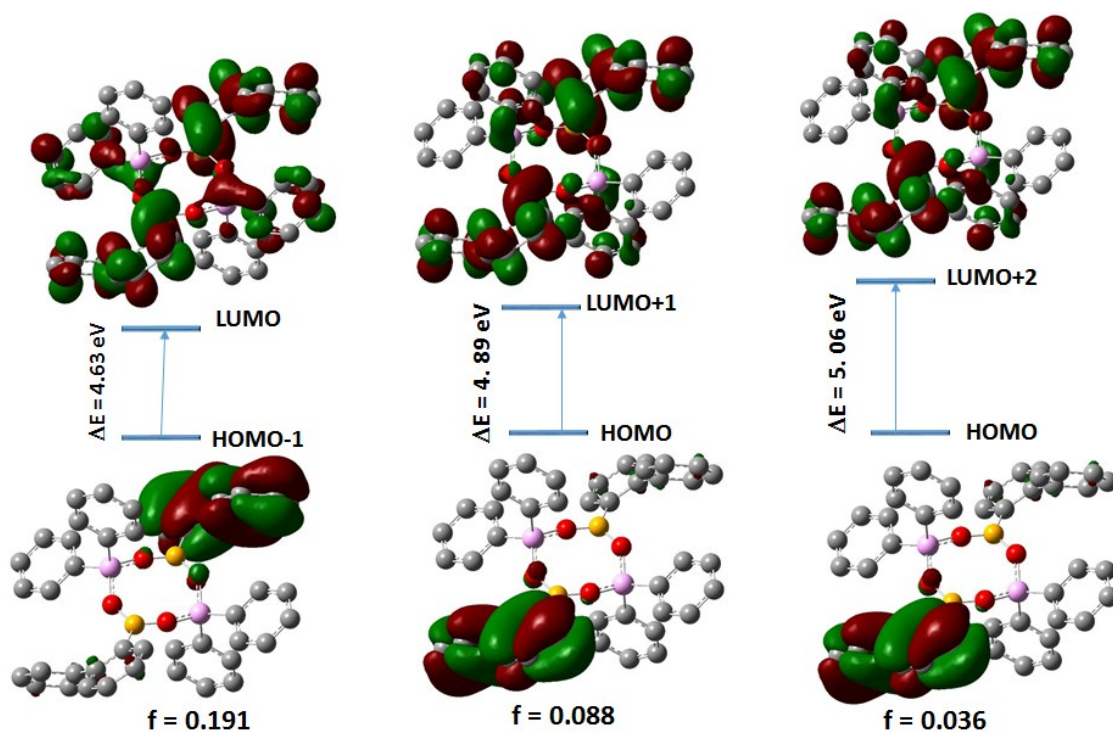

Compound 3

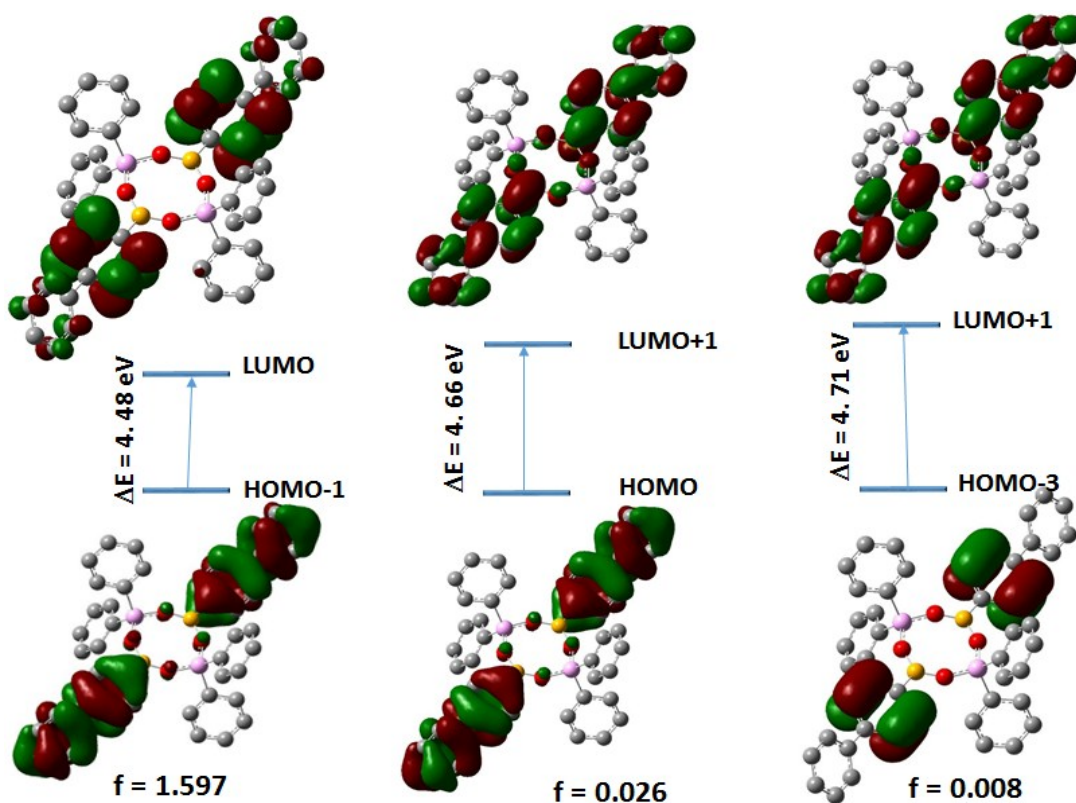

Compound 4

Fig. S2. Frontier molecular orbital energy density plots of **3** and **4**, calculated using TD-DFT with B3LYP/6-31+G\*\* level of theory.

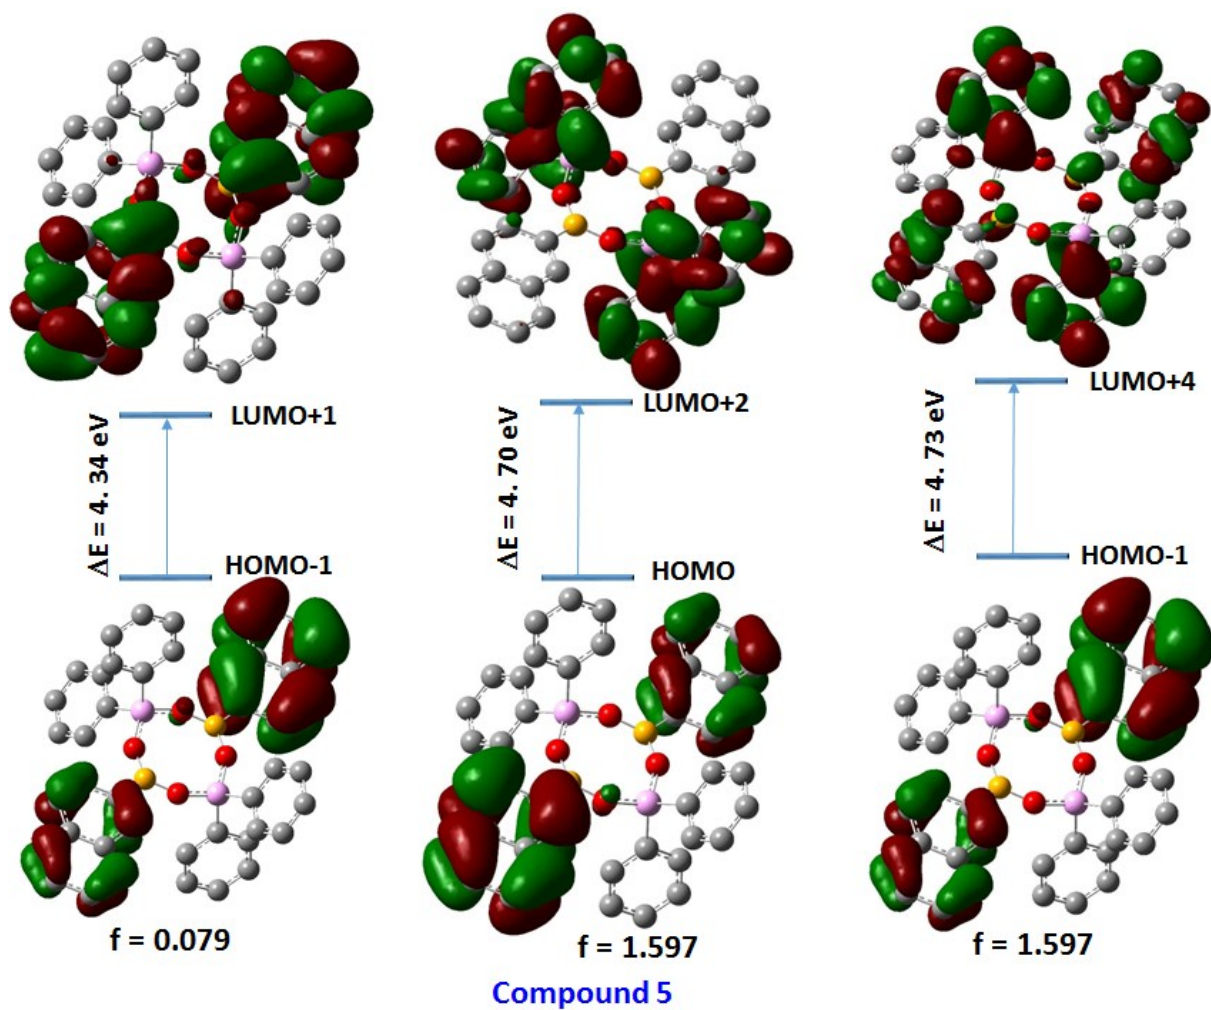

Fig. S3. Frontier molecular orbital energy density plots of **5**, calculated using TD-DFT with B3LYP/6-31+G\*\* level of theory.

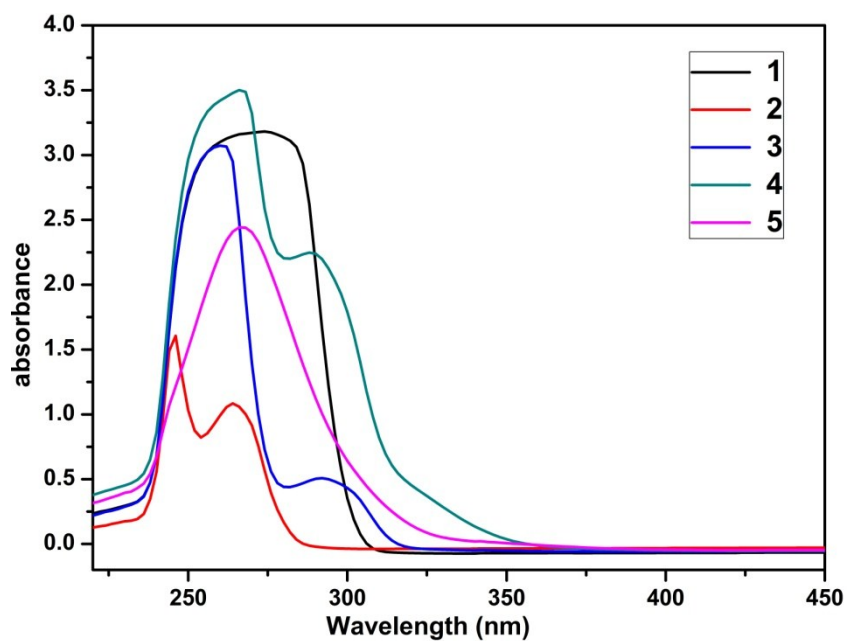

Fig. S4. UV spectra of compounds **1-5** in chloroform.

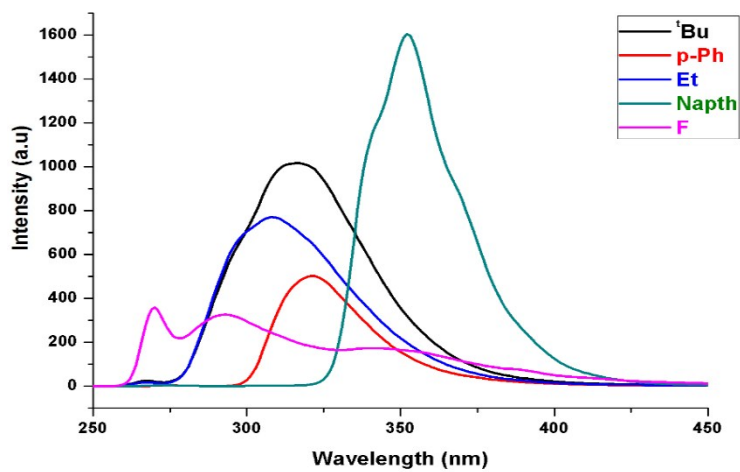

Fig. S5. Fluorescence spectra of compounds **1-5** in chloroform.

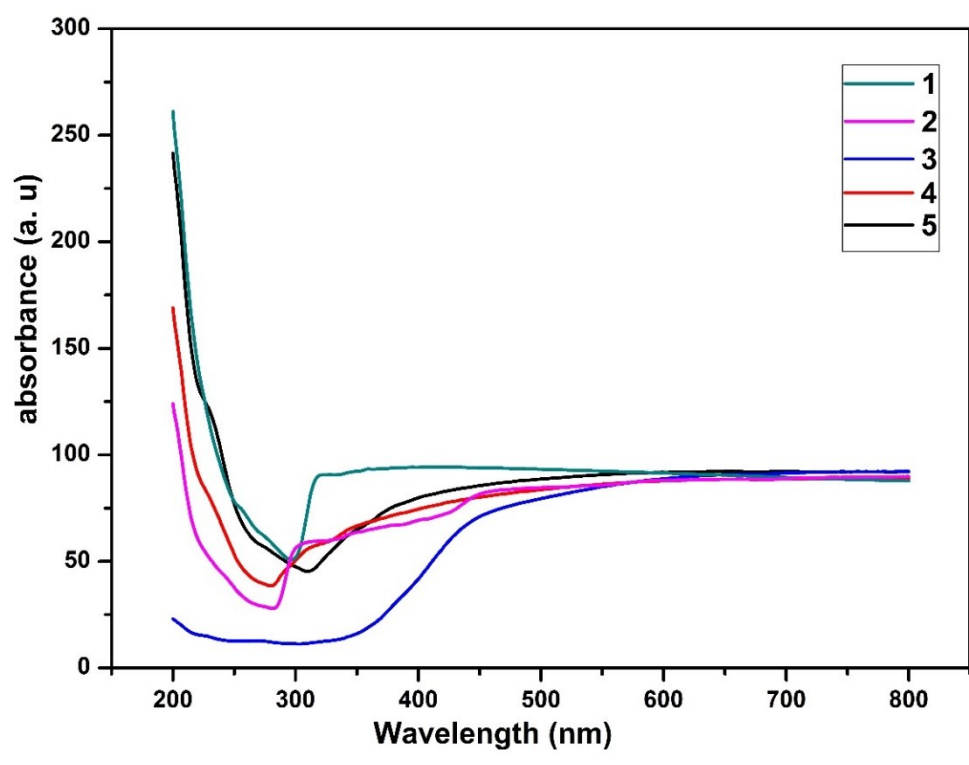

Fig. S6. Diffuse reflectance spectra of compounds 1-5.

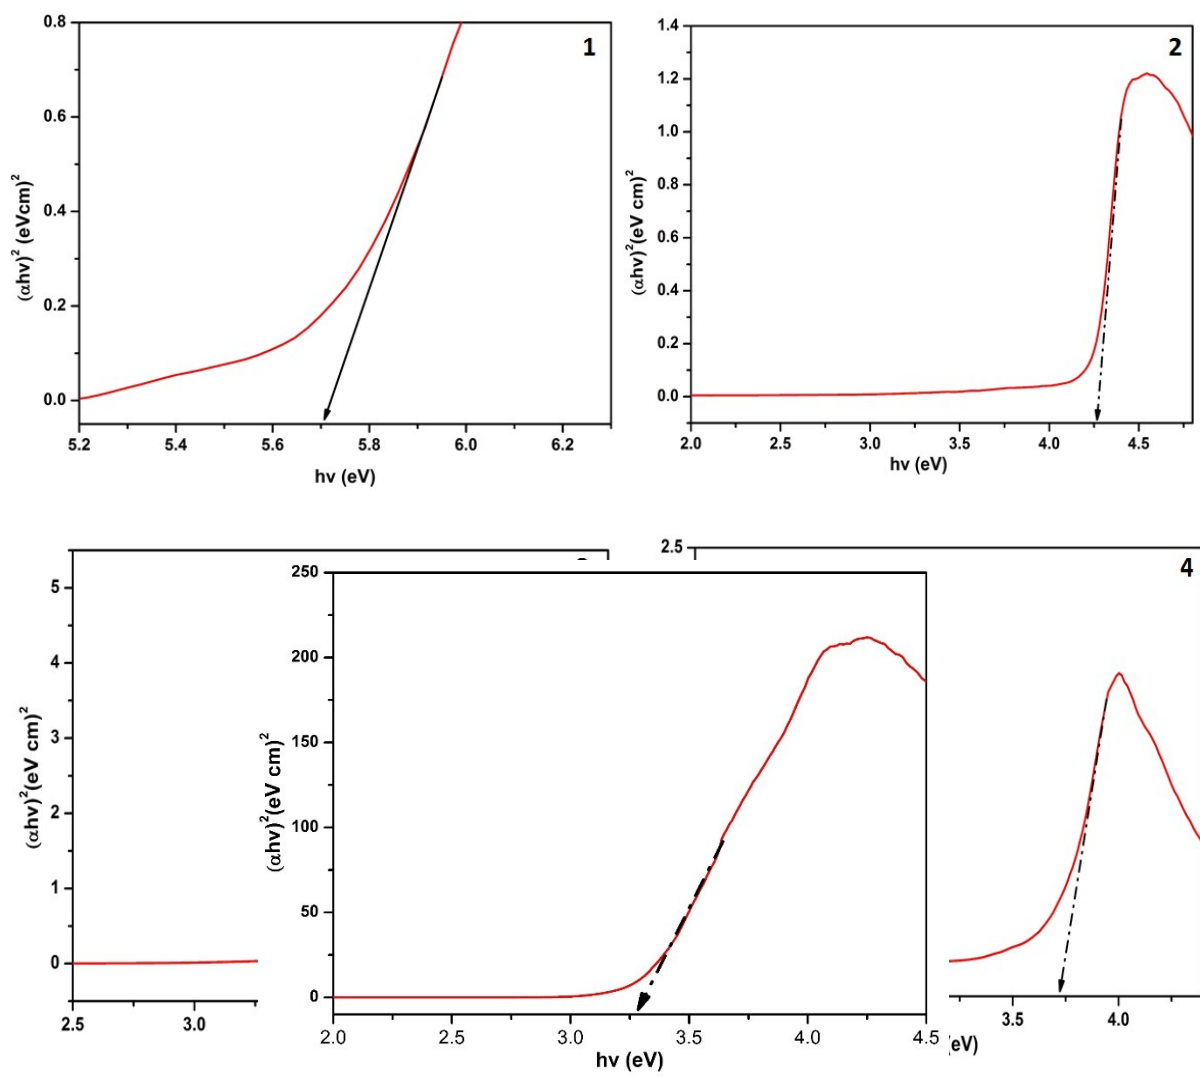

Fig. S7. Bang gap values of Tau's plot for compounds 1-5.

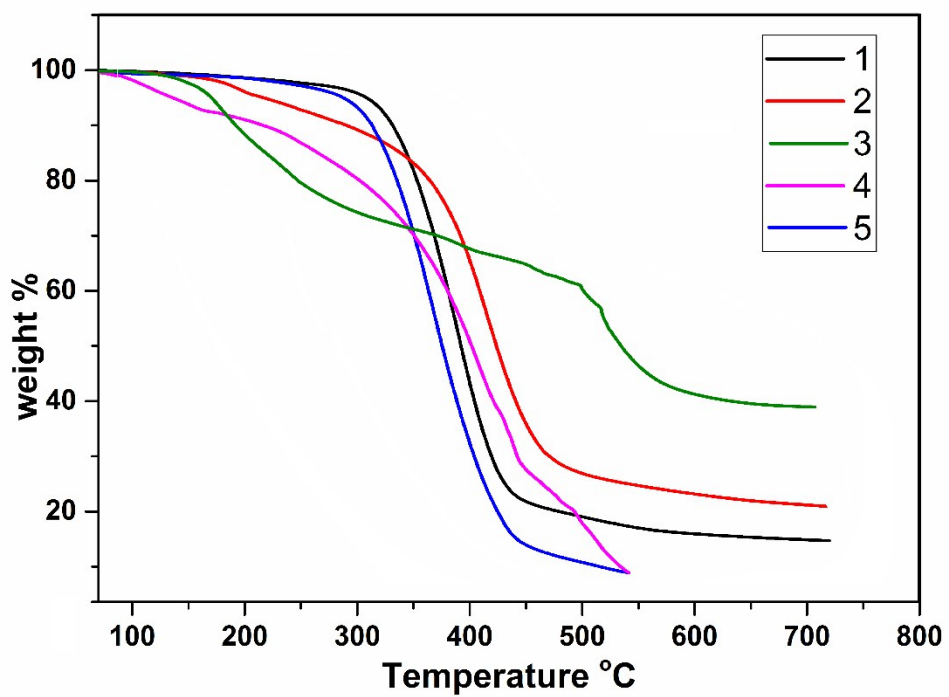

Fig. S8. TGA spectra of compounds 1-5.

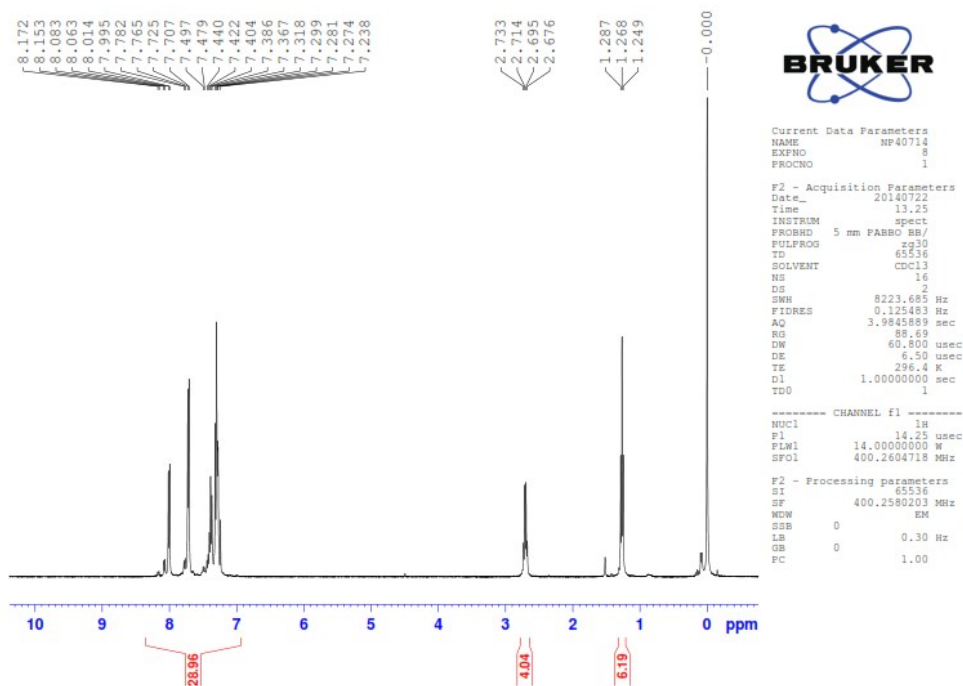

Fig. S9.  $^1\text{H}$  NMR spectrum of compound **1** in  $\text{CDCl}_3$  at 23  $^\circ\text{C}$

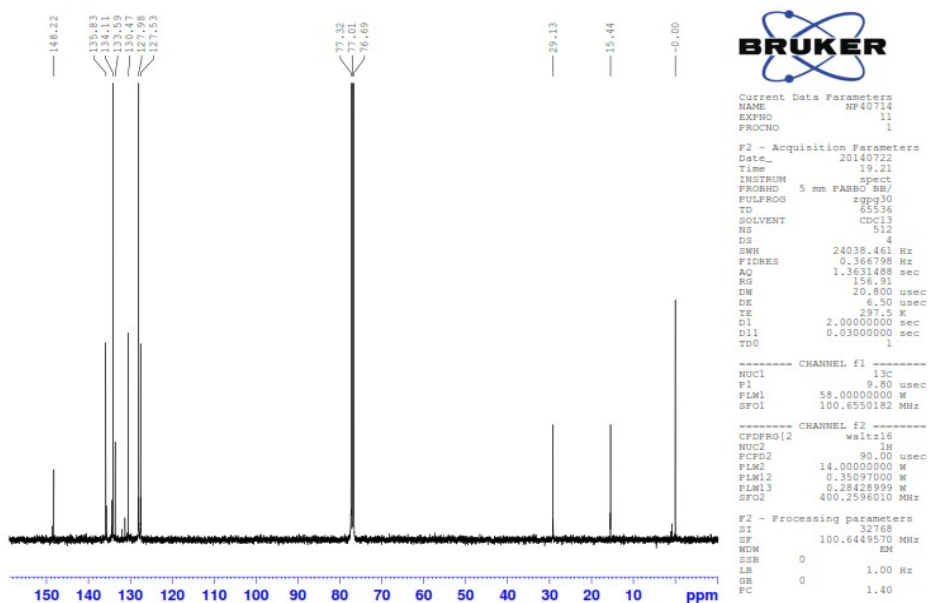

Fig. S10.  $^{13}\text{C}$  NMR spectrum of compound **1** in  $\text{CDCl}_3$  at 23  $^\circ\text{C}$



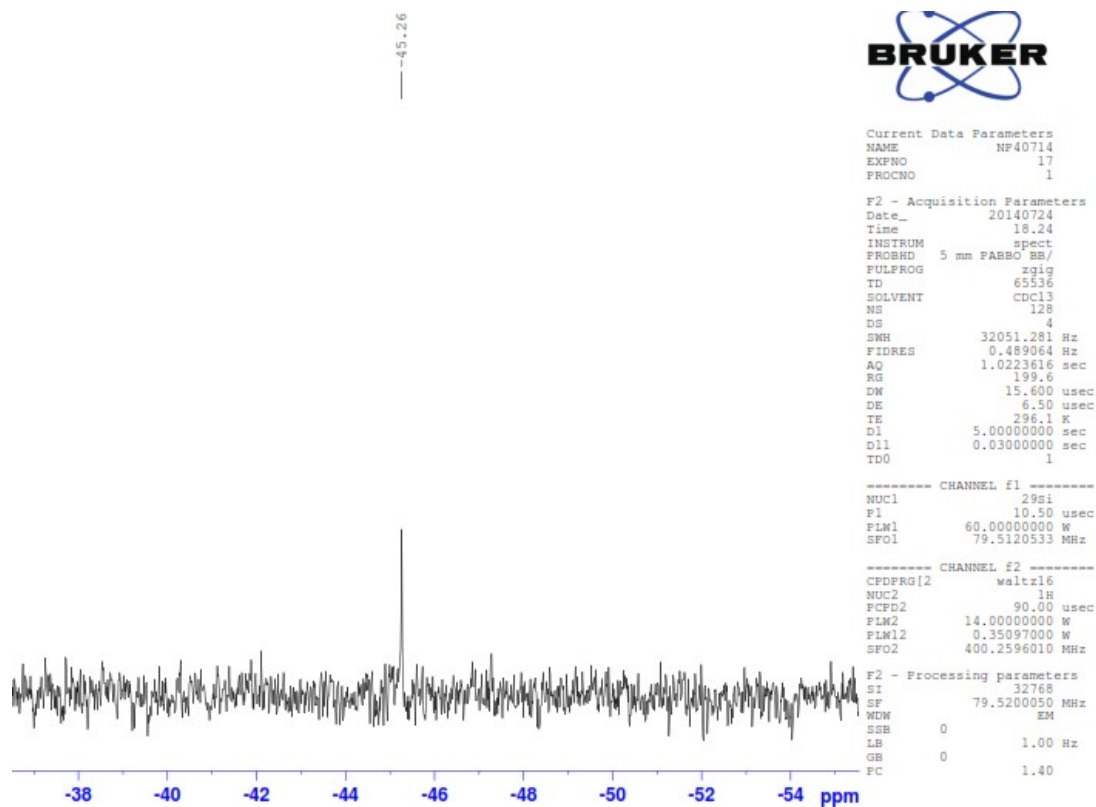

Fig. S11.  $^{29}\text{Si}$  NMR spectrum of compound **1** in  $\text{CDCl}_3$  at 23 °C

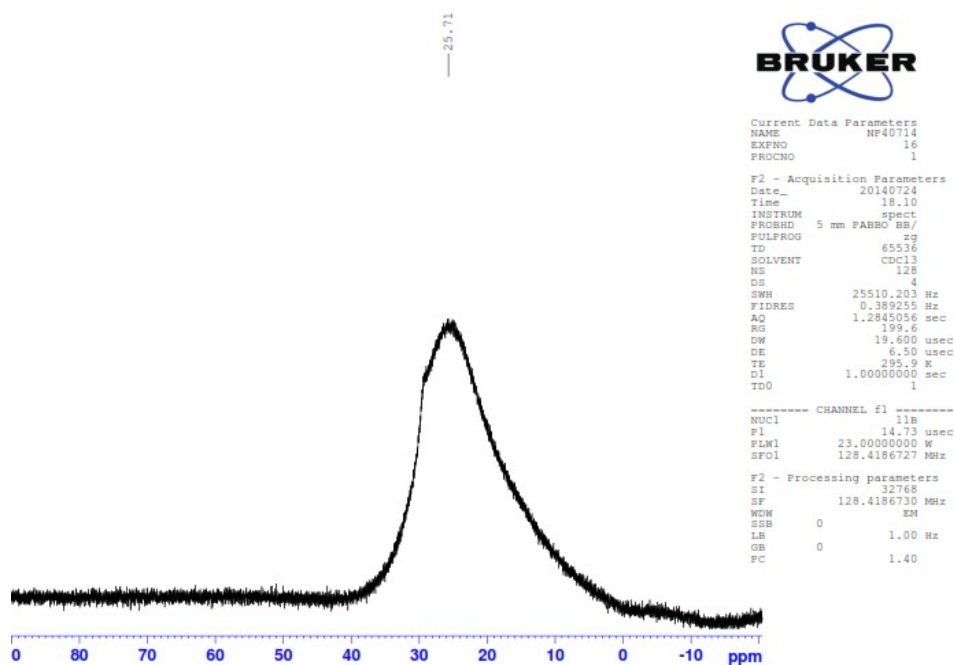

Fig. S12.  $^{11}\text{B}$  NMR spectrum of compound **1** in  $\text{CDCl}_3$  at 22 °C



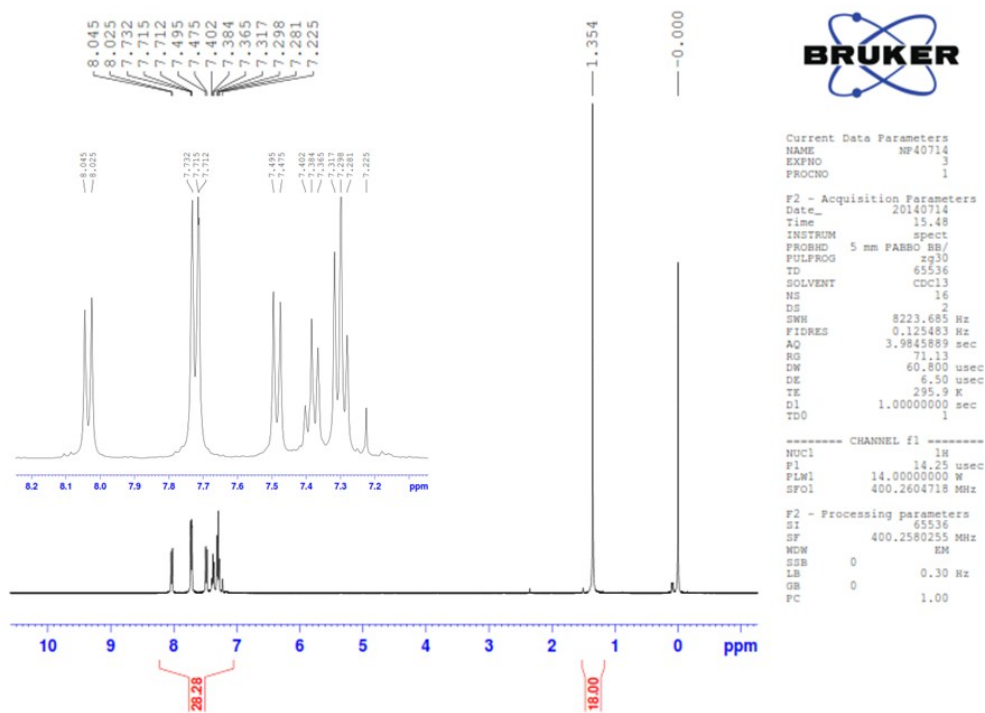

Fig. S13.  $^1\text{H}$  NMR spectrum of compound **2** in  $\text{CDCl}_3$  at 23  $^\circ\text{C}$

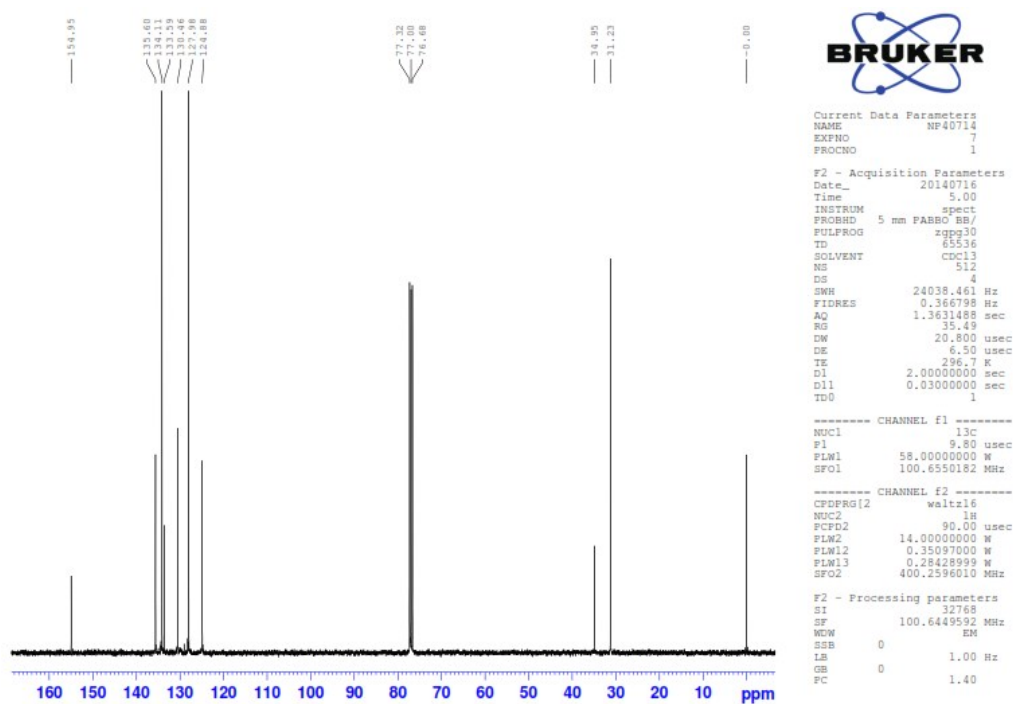

Fig. S14.  $^{13}\text{C}$  NMR spectrum of compound **2** in  $\text{CDCl}_3$  at 23  $^\circ\text{C}$

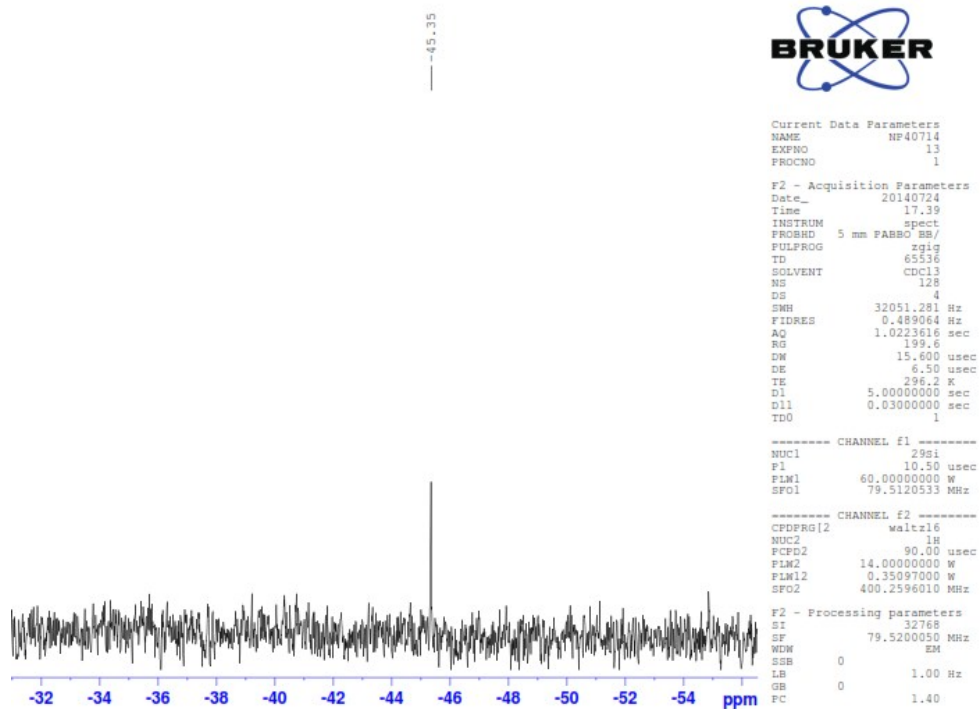

Fig. S15.  $^{29}\text{Si}$  NMR spectrum of compound **2** in  $\text{CDCl}_3$  at 23 °C

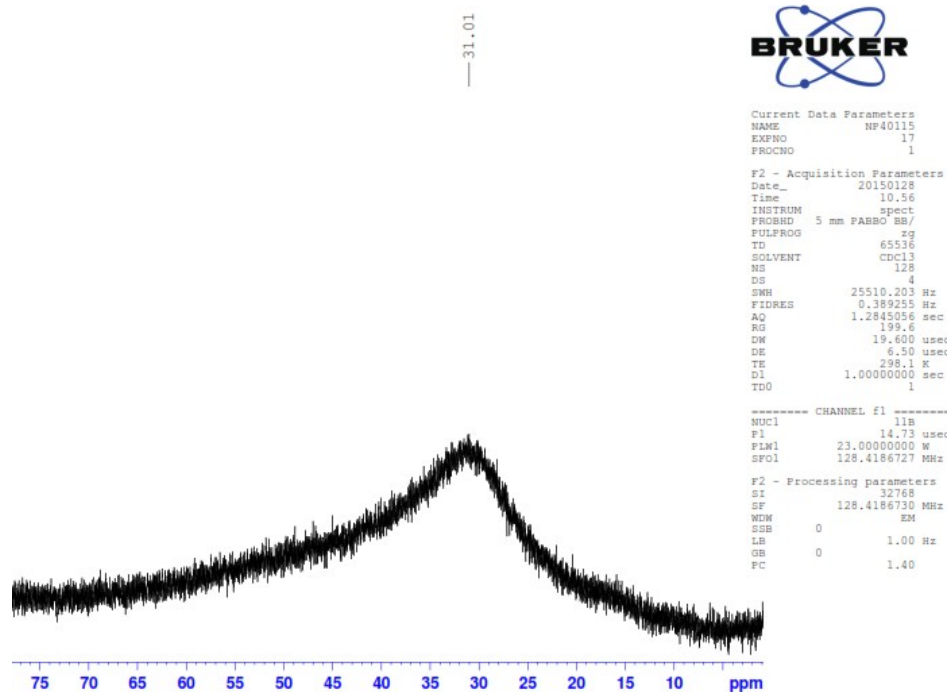

Fig. S16.  $^{11}\text{B}$  NMR spectrum of compound **2** in  $\text{CDCl}_3$  at 25 °C

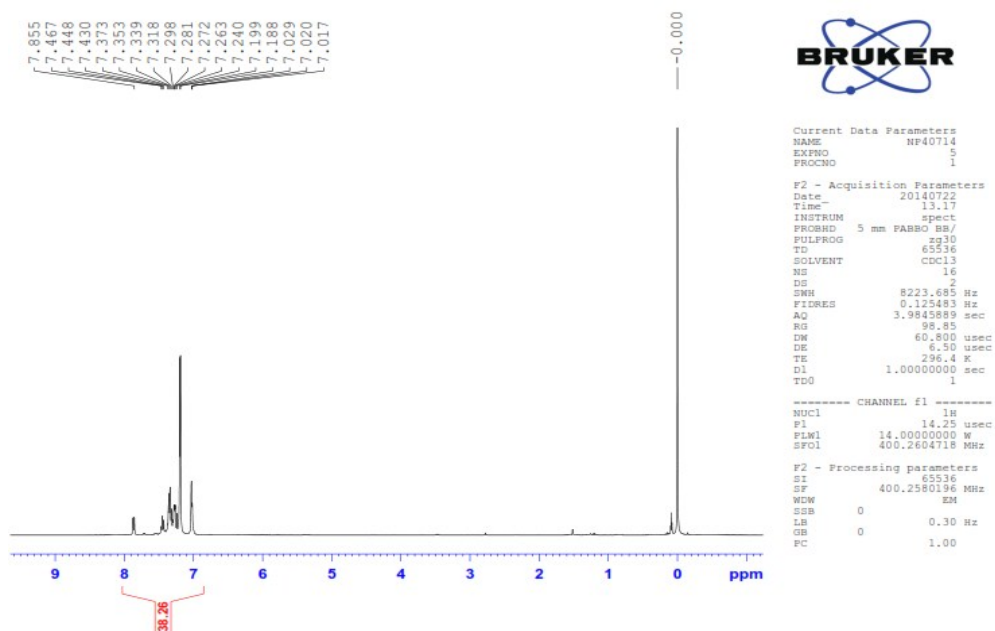

Fig. S17.  $^1\text{H}$  NMR spectrum of compound **3** in  $\text{CDCl}_3$  at 23  $^\circ\text{C}$

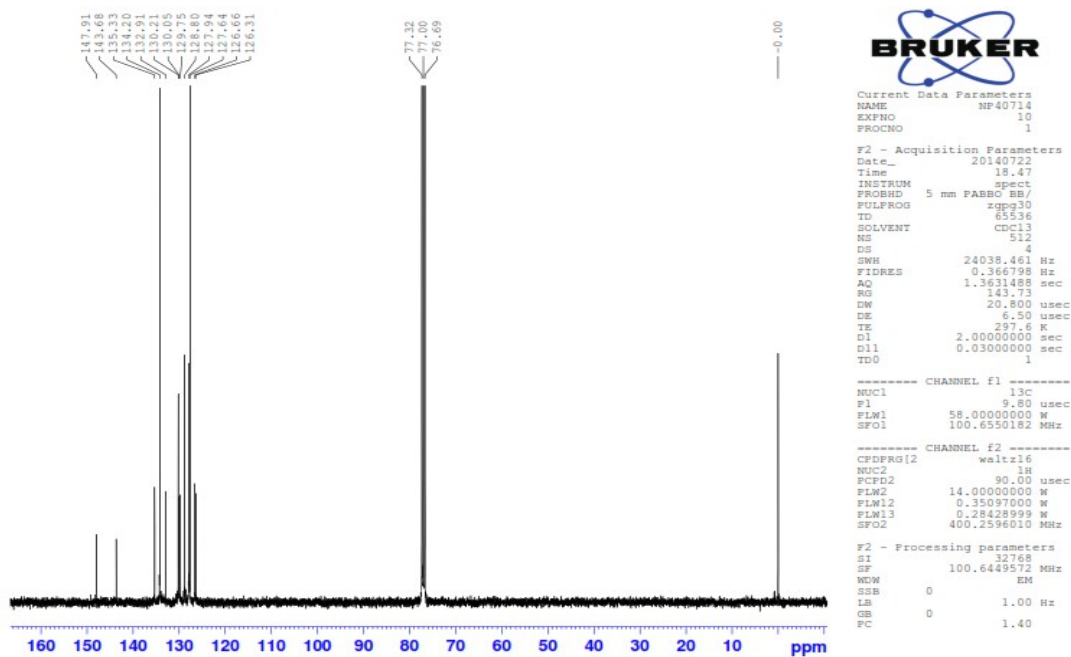

Fig. S18.  $^{13}\text{C}$  NMR spectrum of compound **3** in  $\text{CDCl}_3$  at 23  $^\circ\text{C}$

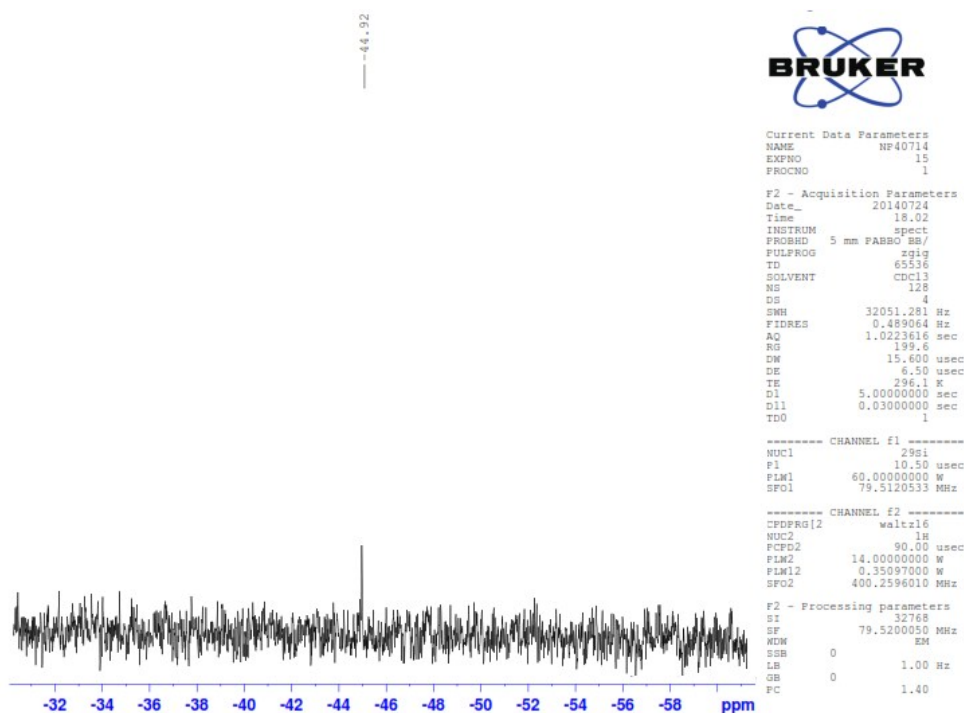

Fig. S19.  $^{29}\text{Si}$  NMR spectrum of compound **3** in  $\text{CDCl}_3$  at 23 °C

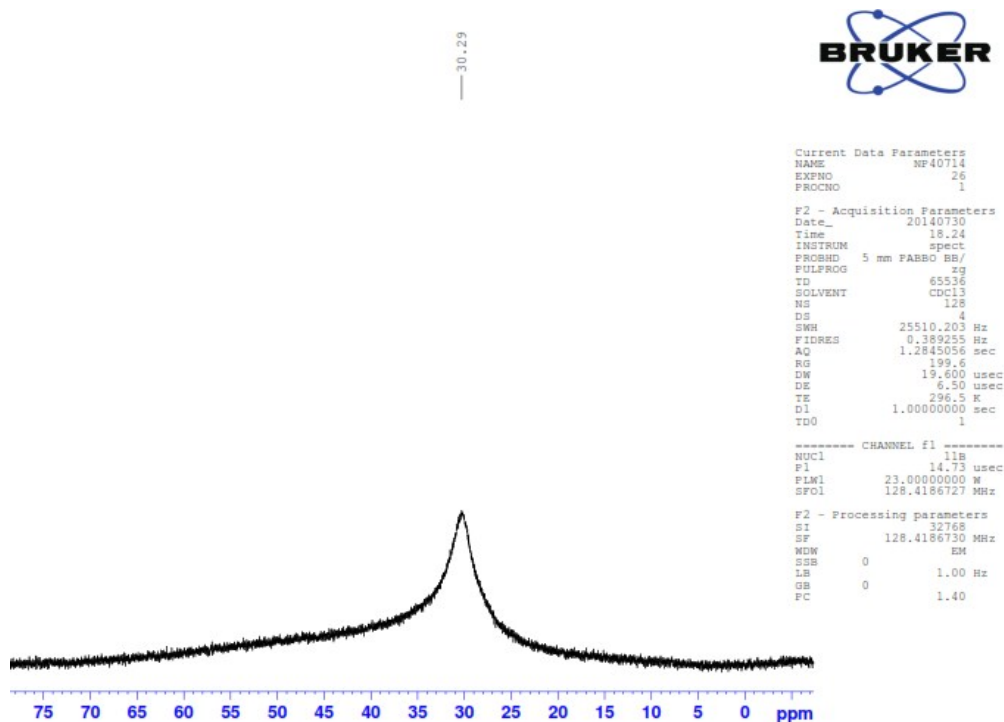

Fig. S20.  $^{11}\text{B}$  NMR spectrum of compound **3** in  $\text{CDCl}_3$  at 23 °C

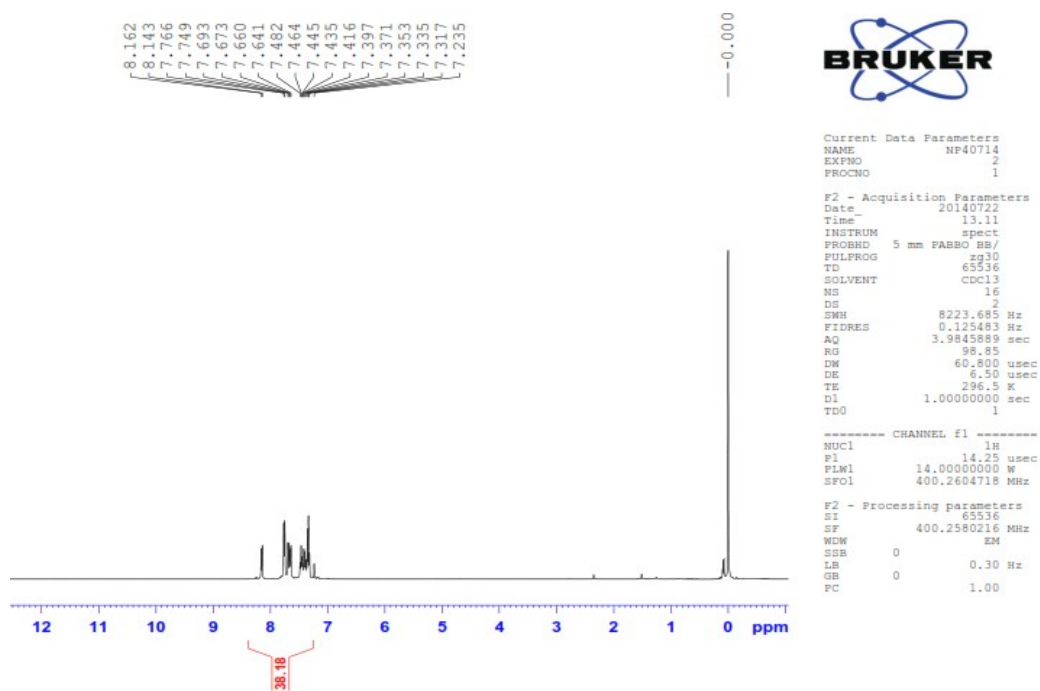

Fig. S21.  $^1\text{H}$  NMR spectrum of compound **4** in  $\text{CDCl}_3$  at 23  $^\circ\text{C}$

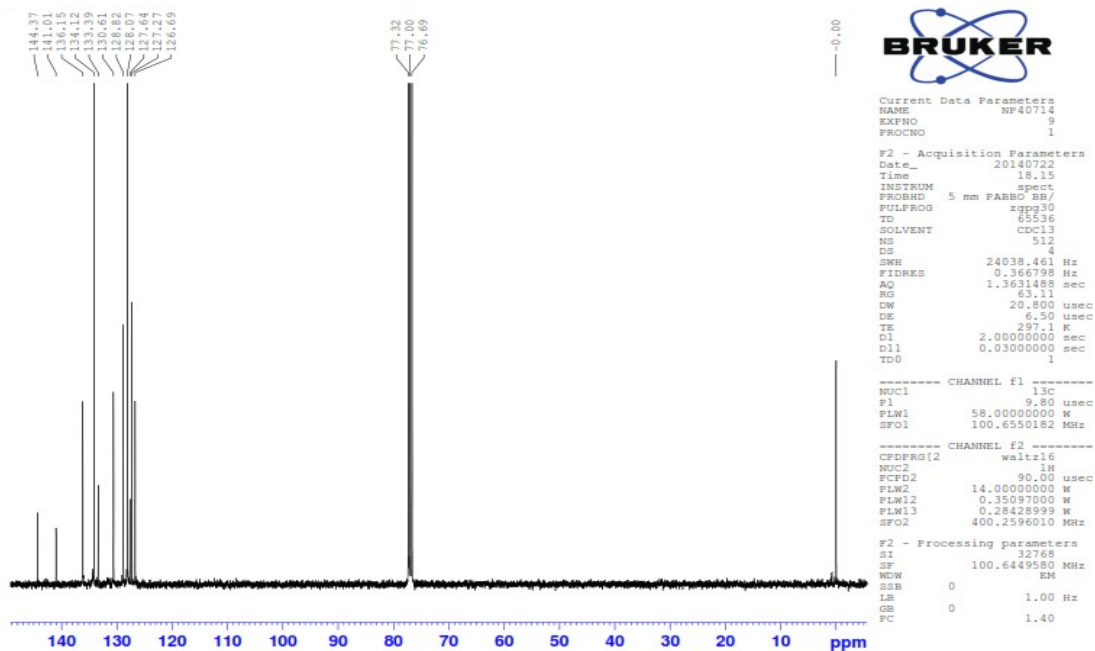

Fig. S22.  $^{13}\text{C}$  NMR spectrum of compound **4** in  $\text{CDCl}_3$  at 24  $^\circ\text{C}$

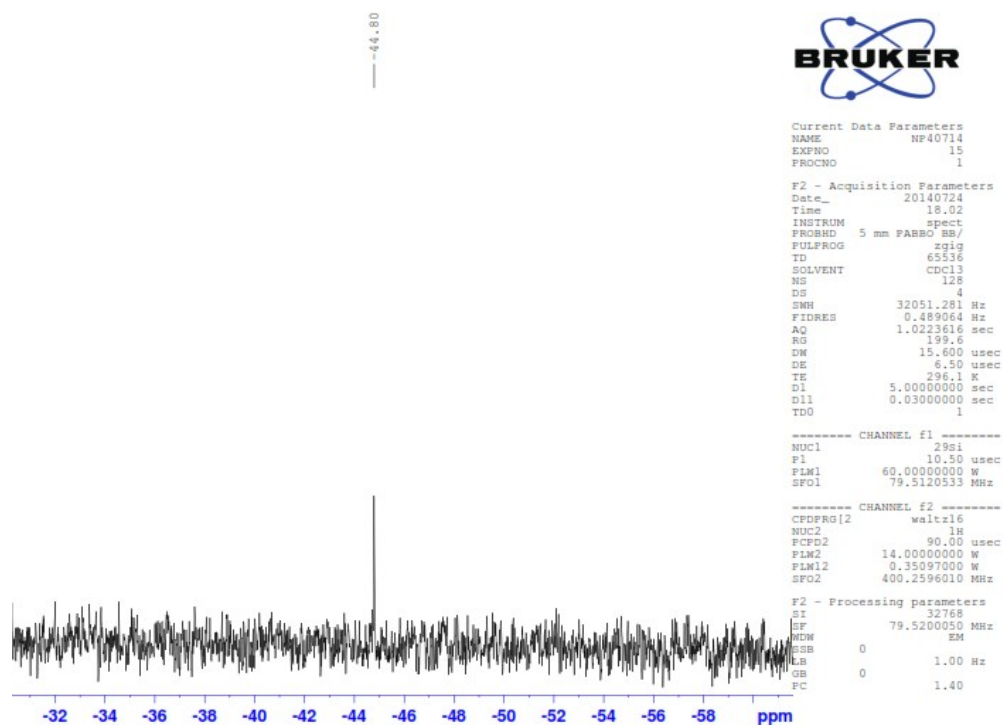

Fig. S23.  $^{29}\text{Si}$  NMR spectrum of compound **4** in  $\text{CDCl}_3$  at 23 °C

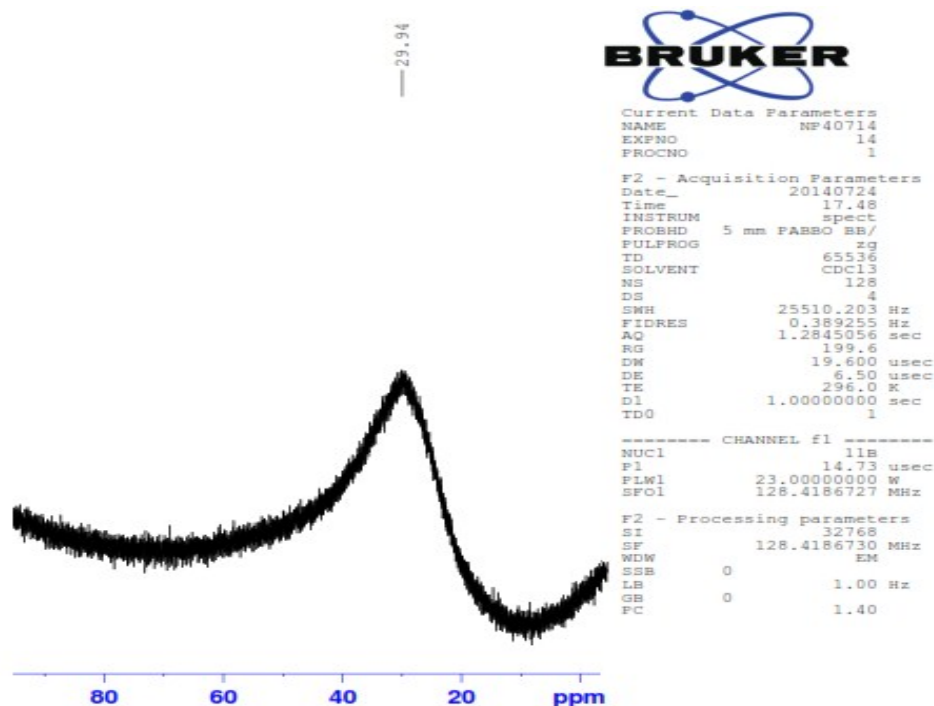

Fig. S24.  $^{11}\text{B}$  NMR spectrum of compound **4** in  $\text{CDCl}_3$  at 23 °C

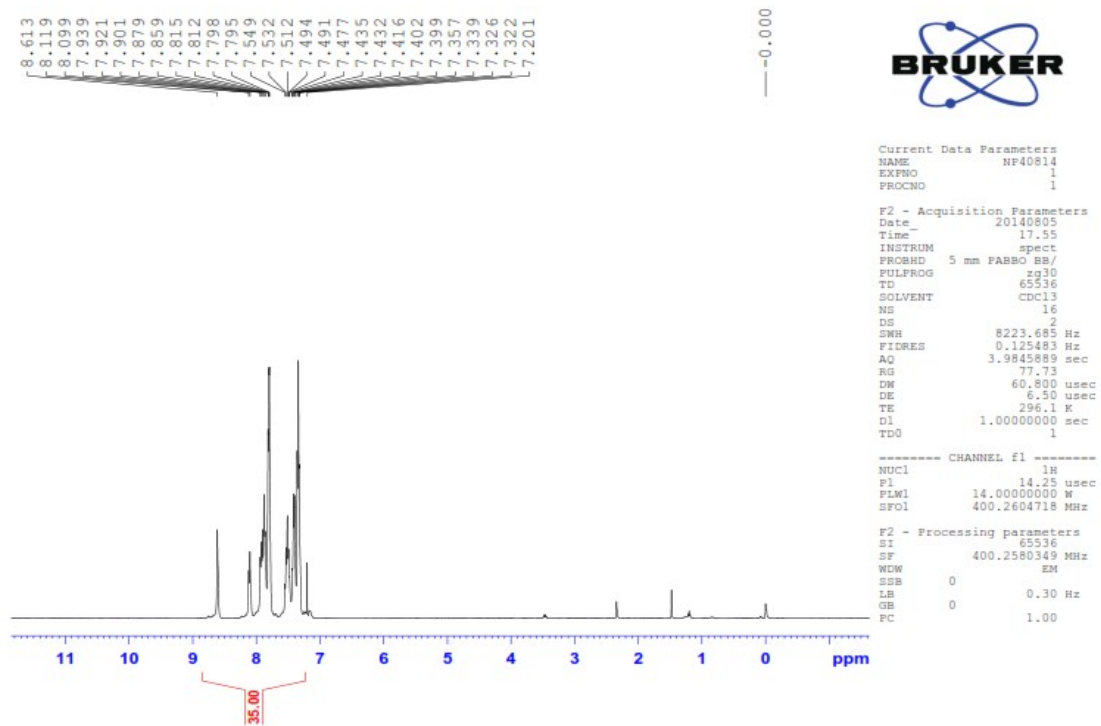

Fig. S25.  $^1\text{H}$  NMR spectrum of compound **5** in  $\text{CDCl}_3$  at 23  $^\circ\text{C}$

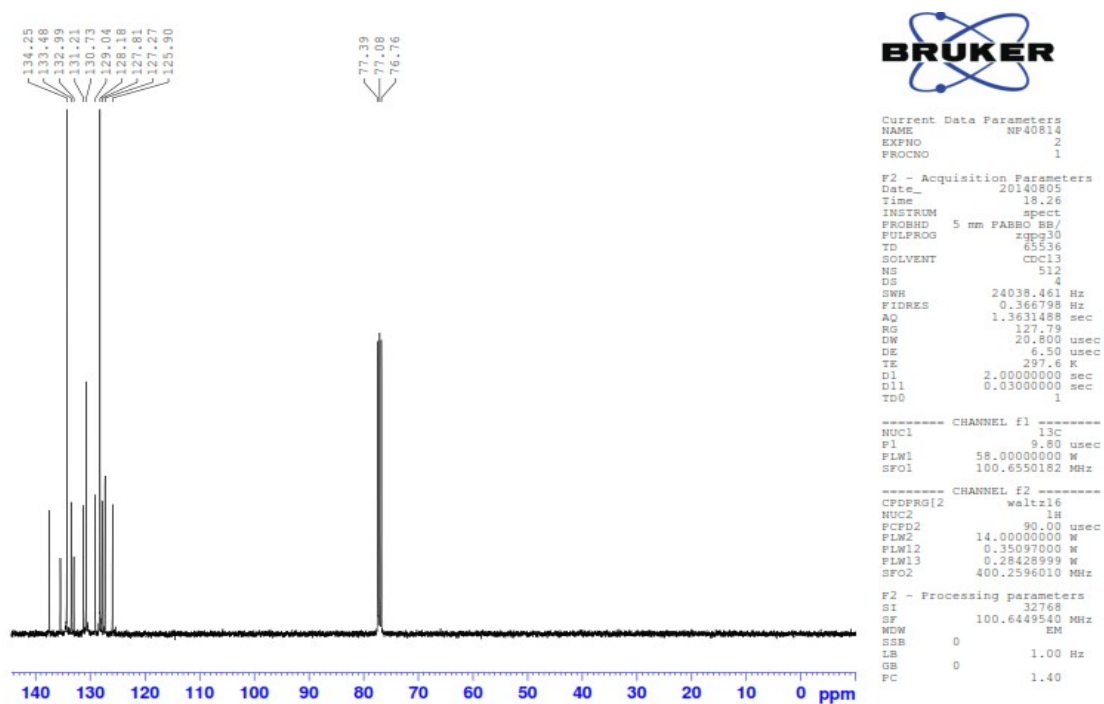

Fig. S26.  $^{13}\text{C}$  NMR spectrum of compound **5** in  $\text{CDCl}_3$  at 24  $^\circ\text{C}$



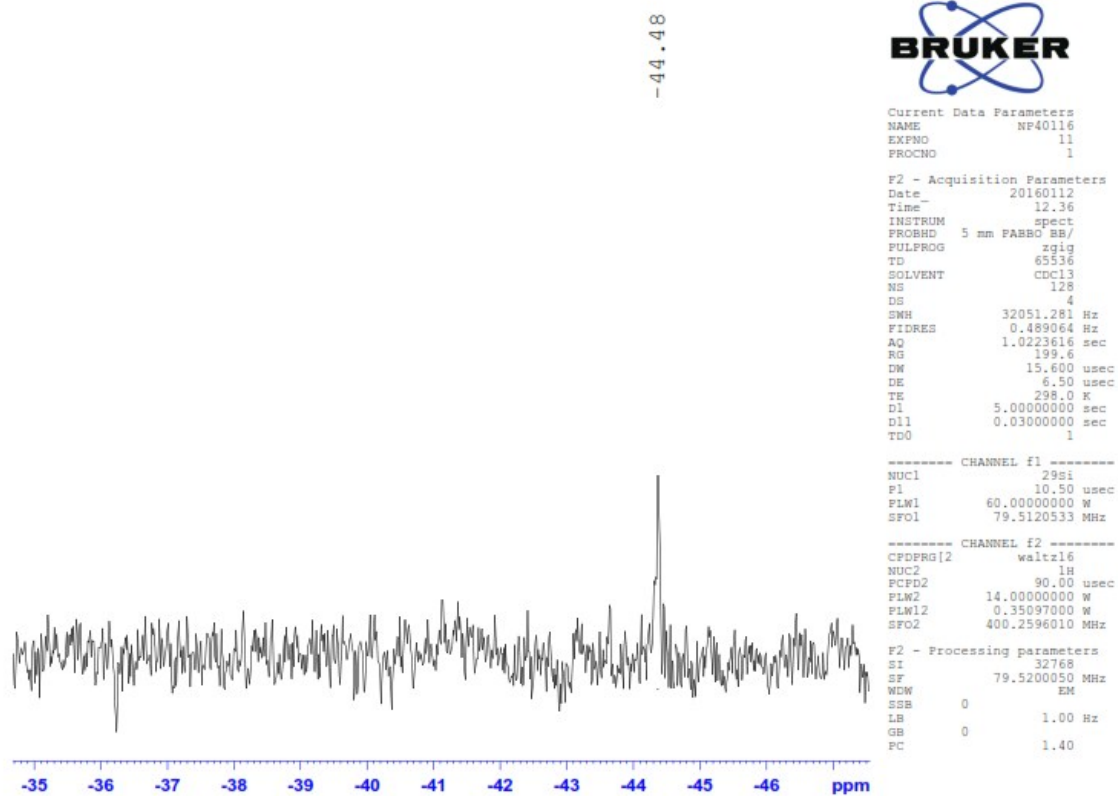

Fig. S27.  $^{29}\text{Si}$  NMR spectrum of compound **4** in  $\text{CDCl}_3$  at 24 °C

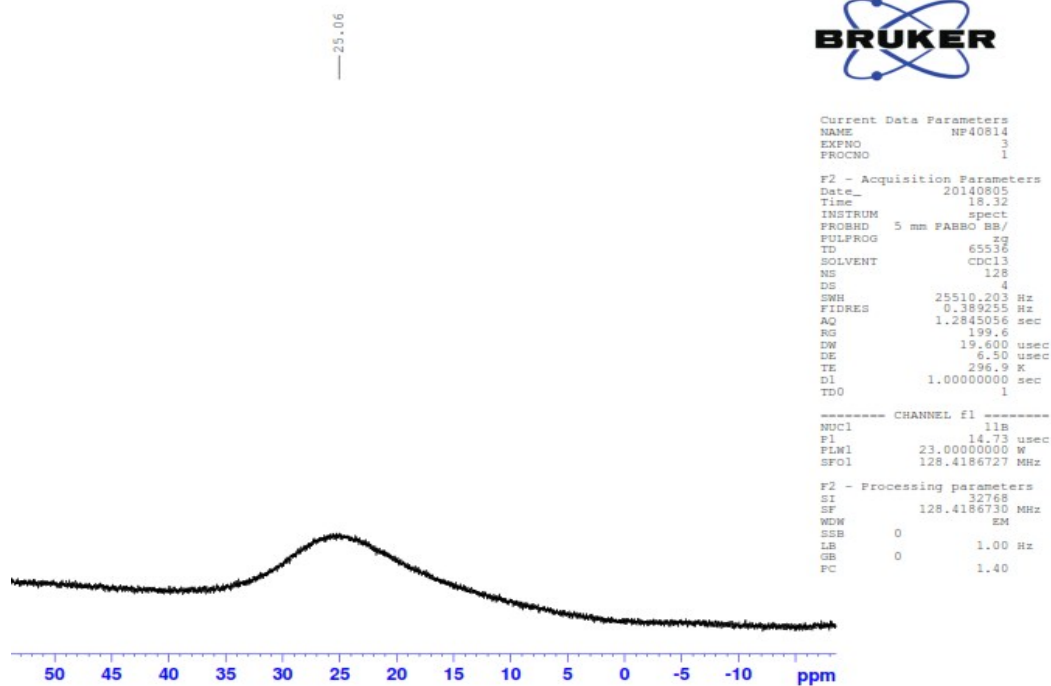

Fig. S28.  $^{11}\text{B}$  NMR spectrum of compound **5** in  $\text{CDCl}_3$  at 23 °C
